# Supplementary material for: High-resolution distribution maps of single-season rice in China from 2017 to 2022
Source: Copernicus journal article supplement (doi:10.5194/essd-2023-9), 2023-01-31
Supplement: Supplementary file [file essd-2023-9-AC1-supplement.pdf]

## Reply to Referee #1

**Food security is crucial to human survival, and this article's proposed large-scale fine-resolution single-season rice mapping method is meaningful. However, there are some questions or problems:**

Thanks for your positive comments. We revised the manuscript based on the comments.

**1. This article uses SAR data in multi-cloud pixels, which is indeed not affected by clouds and mist. However, SAR images are affected by salt-and-pepper noise, can filtering or homogeneous sample point selection method be considered for denoising?**

Sorry for the confusion. The SG filter method mentioned in section 2.2.1 was applied to both Sentinel-2 and Sentinel-1 time series. We have revised the sentence to clarify it.

“To further eliminate the noise in the time series of Sentinel-1 and Sentinel-2 images, a Savitzky-Golay (SG) filter with the order set to two and the window size set to five was applied to smooth the time series.” (Lines 108–110)

**2. The compatibility issue between the SAR VH band and the optical image's SWIR1 band needs to be solved, and a clearer explanation is needed. How do you prove that your processing method regarding this is feasible?**

We have revised the section and added several sentences to explain it more clearly.

“Second, since the distances calculated from different bands (SWIR1 and VH) were related to their values. SWIR1 is the reflectance and has a value ranging from 0 to 1, while VH is the backscattering coefficient and has a value ranging from  $-50$  dB to 1 dB. Therefore, the distances calculated from these two bands are not comparable. In order to combine the distances of the two bands, the distance was replaced by the ranking of the pixel by sorting the distance. Specifically, the distance calculated from the two bands were sorted separately, and the ranking of pixels ranged from 1 to the total number of cropland pixels. Noticed that the area of a 20-m resolution SWIR1

pixel is equivalent to four 10-m resolution VH pixels. That means the total number of SWIR1 pixels is one fourth of VH. Therefore, the ranking of SWIR1 needed to be multiplied by four on each pixel and resampled to 10-m resolution. By following this process, the rankings of two bands would be comparable and the pixel sizes would correspond.” (Lines 182–190)

**3. How does this article handle data of different resolutions (such as 10m and 20m)?**

Please refer to the response #2. The ranking of SWIR1 would be multiplied by four on each pixel and resampled to 10-m resolution to ensure the size of pixels correspond.

**4. Are formulas 3 and 4 referenced? The explanation of formula 3 and its parameters should be more specific.**

$$w = \frac{1}{1 + e^{-\alpha(x-\beta)}} \quad (3)$$

$$d = r_{SWIR1} \times w + r_{VH} \times (1 - w) \quad (4)$$

There are no references to Formulas 3 and 4. It appears that no previous study has made a similar attempt in the field of crop mapping. We have added a few sentences and a new figure to clarify the design concept behind the formulas.

“Since a weighted sum has been used, the sum of the two weights should be equal to 1. Therefore, only the weight of SWIR1 needs to be set here, and the weight of VH can be calculated accordingly. In this study, the weight of SWIR1 was determined based on the quality of the optical images. Specifically, the times of good observations of the optical images were used to calculate the weight of SWIR1. Since the TWDTW method with translation stretching was used, the times of good observations referred to the times of good observations during the period corresponding to the minimum TWDTW distance of SWIR1 (section 2.3.3). Since the weight  $w$  needs to be between 0 and 1, a function is required to map the number of good observations to a value between 0 and 1. The logistic function is commonly used to perform this type of mapping in various studies. This function was used to calculate the time weights mentioned previously, and its special form, the sigmoid function, has

also been utilized as an activation function in some artificial neural networks (Maus et al., 2016; Han and Moraga, 1995). The formula of the logistic function is:

$$w = \frac{1}{1 + e^{-\alpha(x-\beta)}} \quad (3)$$

where  $x$  is the times of good observations and  $\alpha$  and  $\beta$  are parameters. Through a small range of tests,  $\alpha$  and  $\beta$  were set to 2 and 2.5, respectively. The length of the standard time series in subregion II, III and IV was 7, so the value of the times of good observations  $x$  ranged from 0 to 8. By setting the parameters,  $w$  was close to 1 when  $x$  was greater than 3, and close to 0 when  $x$  was less than 2 (Fig. 8). A higher weight would give to VH only in the case of very poor optical observations.” (Lines 191–204)

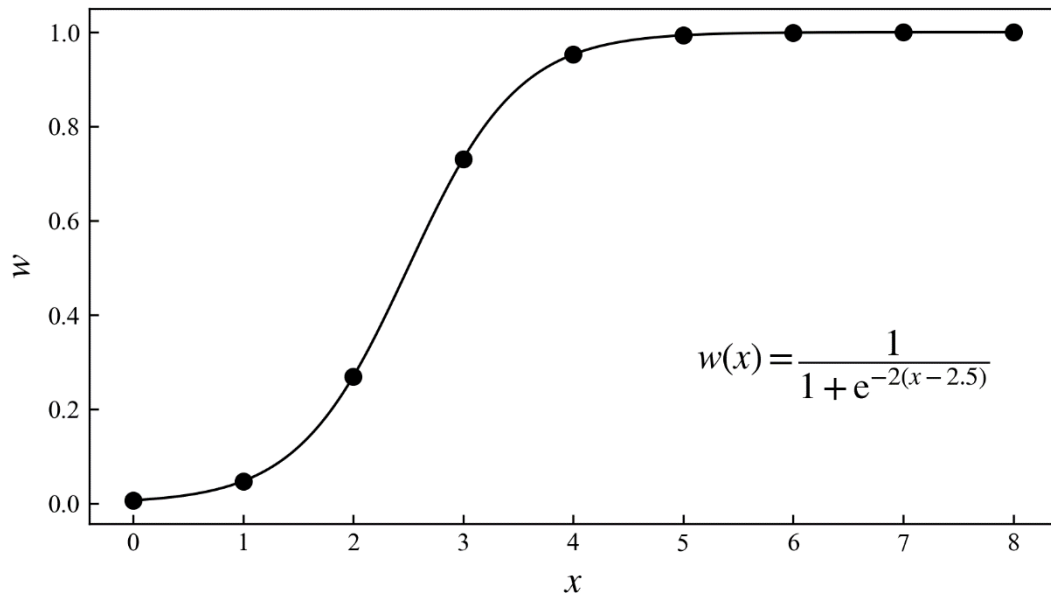

Figure 8: Times of good observation  $x$  and the corresponding weights  $w$  of SWIR1.

**5. In line 217, figure 8a and 8c is not exist, this issue needs to be thoroughly checked.**

Sorry for not checking the image numbers carefully, these should be Figures 9a and 9c. We have rechecked all image numbers.

**6. The distribution of statistical data in 2017 is different from that in other years.**

**Is it a problem of data processing?**

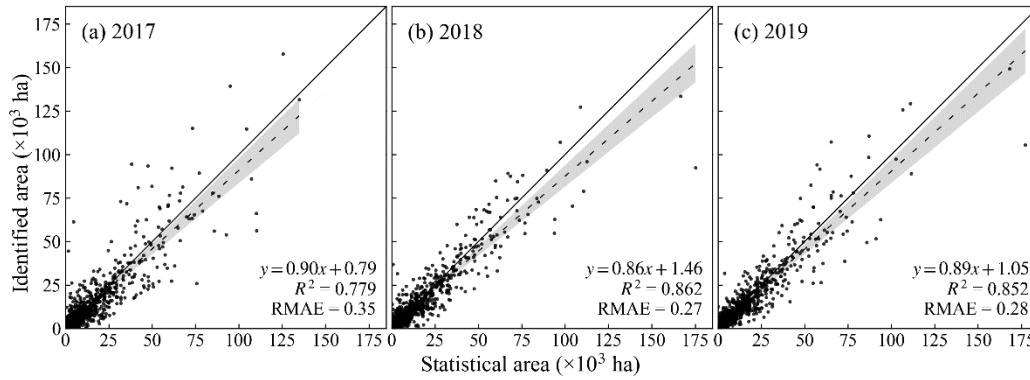

**Figure 11: County-level comparison of identified and statistical planting areas of 2017–2019. Solid lines are 1:1 lines; dashed lines are regression lines. The confidence intervals are shaded in gray.**

In this figure, the county with the largest statistical planting area was around 175 kha in 2018 and 2019, and less than 150 kha in 2017. We checked the original statistical yearbooks, and the county with the largest planting area of single-season rice in all three years was Huoqiu County, Anhui Province. The statistical planting areas of Huoqiu County in the three years were 134.81, 175.26, and 177.24 kha, respectively. Additionally, there was also a significant increase in the statistical planting area in Shouxian County, Anhui Province from 2017 to 2018. The statistical planting areas of Shouxian County in the three years were 125.5, 166.53, and 168.13 kha, respectively. Therefore, the original data itself showed such discrepancies, and were not caused by data processing. On the other hand, the number of counties included in the statistical data collection was different for different years, which also contributed to the apparent difference in the distribution of the data. Moreover, the accuracy of the planting map in 2017 was lower than that in the other two years, which could make the distribution look more scattered. We are aware of the uncertainty in statistical data and only use it for comparison purposes here, as there are no other options.

## **Reply to Referee #2**

**This manuscript introduces a set of single-season rice map data in China, which has potential implications for food security and agricultural planning. The method and results are well presented. The data described in the paper is accessible and reusable. However, there are several points that require further clarification:**

Thanks for your positive comments. We revised the manuscript based on the comments.

**1. The study area encompasses 21 provinces in China. Could the authors elaborate on why other regions, such as the Northwestern region, were not included in the study?**

**“This study was conducted in 21 provincial administrative regions in mainland China, where the total planting area of single-season rice was 19.92 million hectares, accounting for approximately 99.01 % of the total planting area of single-season rice in mainland China according to the statistical data in 2018 (<https://data.stats.gov.cn>). The total production of the single-season rice in the study area was 150.46 million tons, accounting for approximately 98.91 % of the total production in mainland China in 2018.” (Lines 72–76)**

The study area was selected based on statistical data of each provincial administrative region. The statistical planting area and production of single-season rice in the study area accounted for about 99 % of the total planting area and production of China. Almost no single-season rice is cultivated outside of the study area. Some Northwestern provinces, such as Qinghai, Gansu, and Xinjiang, have vast areas but very little rice cultivation. Including these provinces would significantly increase the calculation time. Therefore, only these 21 provincial administrative regions were selected as the study area in this study.

**2. The manuscript mentions a planting frequency map. Is this map available for download? I was unable to locate it in the provided data repository.**

The dataset does not include a planting frequency map, as this map is simply an overlay of distribution maps over the 6 years to provide an overview. We consider this to be an analysis and not a part of the data product. Therefore, it is not included in the dataset, however this map can be easily produced by using annual distribution datasets over the 6 years which have been provided by this manuscript.

**3. Figure 9 presents a comparison between the UAV image and the rice mapping result, but the comparison is hard to interpret. I recommend using the UAV image as the base map in subfigures d-f to facilitate clearer comparisons.**

We have revised the figure using UAV image as a base map.

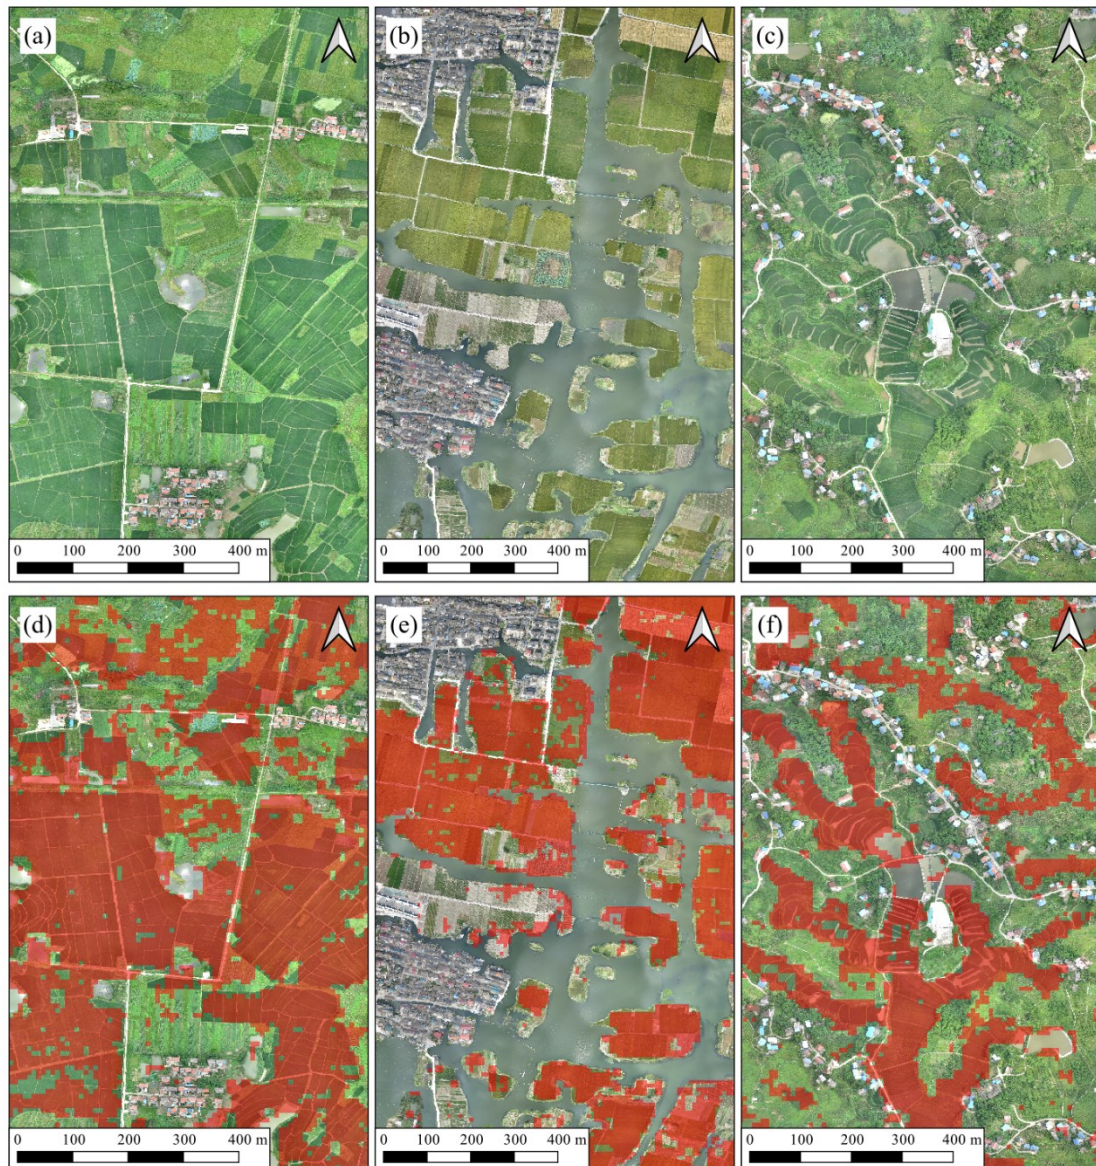

**Figure 10:** Distribution map in three UAV sites of Hubei ( $114^{\circ}47'49''$  E,  $31^{\circ}1'11''$  N), Zhejiang

(120°32'33" E, 29°57'14" N), and Sichuan (106°44'15" E, 30°19'5" N). (a)–(c) are very-high-resolution UAV images taken at three sites on July 8, 2018, October 12, 2018, and July 13, 2018, respectively. (d)–(f) overlaid distribution maps with identified single-season rice pixels indicated in red.

**4. The discussion section appears lengthy and unstructured. I suggest reorganizing this section and categorizing the discussion into subsections according to the topic.**

Thanks, we have divided the discussion section into three subsections, namely “Advantages of the TWDTW method”, “Uncertainty analysis”, and “Future development”.

**5. Most importantly, the paper lacks a description of data sustainability, which is crucial for readers intending to reuse the data. The current data set includes the mapping result for 2017-2022. Are there plans to continue the project in subsequent years? It is unfortunate that many projects and data were discontinued after the paper was published. So I highly recommend including a data management plan in the manuscript, particularly given its submission to a scientific data journal. For instance, if the project is to continue, what is the operational plan? If not, how can users reproduce the data independently?**

Thanks for your constructive comment. Yes, it is very important to update the annual distribution, and we are willing to do so. We have added a sentence to the Data availability section to describe the data update plan.

“The distribution map of single-season rice will be updated annually at the end of each year.” (Line 318)

## References

Han, J. and Moraga, C.: The influence of the sigmoid function parameters on the speed of backpropagation learning, in: From Natural to Artificial Neural Computation, Berlin, Heidelberg, 195–201, [https://doi.org/10.1007/3-540-59497-3\\_175](https://doi.org/10.1007/3-540-59497-3_175), 1995.

Maus, V., Camara, G., Cartaxo, R., Sanchez, A., Ramos, F. M., and de Queiroz, G. R.: A Time-Weighted Dynamic Time Warping Method for Land-Use and Land-Cover

Mapping, *IEEE Journal of Selected Topics in Applied Earth Observations and Remote Sensing*, 9, 3729–3739, <https://doi.org/10.1109/JSTARS.2016.2517118>, 2016.
